# Supplementary material for: Integrated Item Response Theory Modeling of Multiple Patient-Reported Outcomes Assessing Lower Urinary Tract Symptoms Associated with Benign Prostatic Hyperplasia
Source: PubMed Central journal article supplement (PMC7391402; doi:10.1208/s12248-020-00484-7), 2020-07-29
Supplement: 12248_2020_484_MOESM2_ESM.pdf [file 12248_2020_484_MOESM2_ESM.pdf]

```

$PROBLEM

$INPUT  ID ITEM NDAY TIME DV GRP MDV RESV

$DATA  ....csv IGNORE=@

$PRED

;Covariates -----
;;; BASERESV-DEFINITION START
IF(RESV.EQ.-99) THEN
  BASERESV = 0
ELSE
  BASERESV = ( 0 + THETA(71)*(RESV - 48.3))
ENDIF
;;; BASERESV-DEFINITION END
;;; BASE-RELATION START
BASECOV=BASERESV
;;; BASE-RELATION END
;Longitudinal parameters -----
TVBASE = THETA(66)
TVBASE = BASECOV+TVBASE
BASE = TVBASE + ETA(1) ; baseline latent disability
TVASY = THETA(67)
ASY=TVASY*(1+ETA(2)) ; Asymptote Maximum decrease in disease Status
TPROG = THETA(68)*EXP(ETA(4)) ; T1/2 describing disease progression rate
SLPREL=ETA(3) ; no theta associated with this parameter (i.e. fixed to 0)
TVDRUG=0
IF(TIME.GT.0.AND.GRP.GT.0) TVDRUG=THETA(70)
PSI = BASE + ASY*(1-EXP(-(LOG(2)/TPROG*TIME)**WEI)) + SLPREL*TIME + TVDRUG ; longitudinal trajectory of latent disability
;-----assignment of item parameters-----
;Constants to select the model type
GR5=1
GR6=2
GR13=3
MODEL=0
;Define ICCs for IPSS items (ITEM=1 to ITEM=7)
IF(ITEM.EQ.1) THEN
  MODEL=GR5
  DIS=THETA(3) ; I1DISGR

```

DIF1=THETA(4) ; I1DIF1GR

DIF2=THETA(5) ; I1DIF2GR

DIF3=THETA(6) ; I1DIF3GR

DIF4=THETA(7) ; I1DIF4GR

DIF5=THETA(8) ; I1DIF5GR

ENDIF

; excluded code for IPSS items 2 to 6 for brevity

IF(ITEM.EQ.7) THEN

MODEL=GR5

DIS=THETA(39) ; I7DISGR

DIF1=THETA(40) ; I7DIF1GR

DIF2=THETA(41) ; I7DIF2GR

DIF3=THETA(42) ; I7DIF3GR

DIF4=THETA(43) ; I7DIF4GR

DIF5=THETA(44) ; I7DIF5GR

ENDIF

; Define QoL item

IF(ITEM.EQ.8) THEN

MODEL=GR6

DIS=THETA(45) ; QoLDISGR

DIF1=THETA(46) ; QoLDIF1GR

DIF2=THETA(47) ; QoLDIF2GR

DIF3=THETA(48) ; QoLDIF3GR

DIF4=THETA(49) ; QoLDIF4GR

DIF5=THETA(50) ; QoLDIF5GR

DIF6=THETA(51) ; QoLDIF5GR

ENDIF

; Define BII summary score

IF(ITEM.EQ.9) THEN

MODEL=GR13

DIS=THETA(52) ; BIIDISGR

DIF1=THETA(53) ; BIIDIF1GR

DIF2=THETA(54) ; BIIDIF2GR

DIF3=THETA(55) ; BIIDIF3GR

DIF4=THETA(56) ; BIIDIF4GR

DIF5=THETA(57) ; BIIDIF5GR

```
DIF6=THETA(58) ; BIIDIF6GR
DIF7=THETA(59) ; BIIDIF7GR
DIF8=THETA(60) ; BIIDIF8GR
DIF9=THETA(61) ; BIIDIF9GR
DIF10=THETA(62) ; BIIDIF10GR
DIF11=THETA(63) ; BIIDIF11GR
DIF12=THETA(64) ; BIIDIF12GR
DIF13=THETA(65) ; BIIDIF13GR
```

```
ENDIF
```

```
;------IPSS Graded response model implementation (0-5) -----
```

```
IF(MODEL.EQ.GR5) THEN
```

```
DIFG1=DIF1
```

```
DIFG2=DIFG1+DIF2
```

```
DIFG3=DIFG2+DIF3
```

```
DIFG4=DIFG3+DIF4
```

```
DIFG5=DIFG4+DIF5
```

```
PGE1=EXP(DIS*(PSI-DIFG1))/(1+EXP(DIS*(PSI-DIFG1)))
```

```
PGE2=EXP(DIS*(PSI-DIFG2))/(1+EXP(DIS*(PSI-DIFG2)))
```

```
PGE3=EXP(DIS*(PSI-DIFG3))/(1+EXP(DIS*(PSI-DIFG3)))
```

```
PGE4=EXP(DIS*(PSI-DIFG4))/(1+EXP(DIS*(PSI-DIFG4)))
```

```
PGE5=EXP(DIS*(PSI-DIFG5))/(1+EXP(DIS*(PSI-DIFG5)))
```

```
P0=1-PGE1
```

```
P1=PGE1-PGE2
```

```
P2=PGE2-PGE3
```

```
P3=PGE3-PGE4
```

```
P4=PGE4-PGE5
```

```
P5=PGE5
```

```
ENDIF
```

```
;;Select appropriate P(Y=k)
```

```
IF(MODEL.EQ.GR5.AND.DV.EQ.0) P=P0
```

```
IF(MODEL.EQ.GR5.AND.DV.EQ.1) P=P1
```

```
IF(MODEL.EQ.GR5.AND.DV.EQ.2) P=P2
```

```
IF(MODEL.EQ.GR5.AND.DV.EQ.3) P=P3
```

```
IF(MODEL.EQ.GR5.AND.DV.EQ.4) P=P4
```

```
IF(MODEL.EQ.GR5.AND.DV.EQ.5) P=P5
```

;IPRED = (P1\*1) + (P2\*2) + (P3\*3) + (P4\*4) + (P5\*5)

;RES = DV - IPRED

;------QoL Graded response model implementation (0-6) -----

IF(MODEL.EQ.GR6) THEN

DIFG1=DIF1

DIFG2=DIFG1+DIF2

DIFG3=DIFG2+DIF3

DIFG4=DIFG3+DIF4

DIFG5=DIFG4+DIF5

DIFG6=DIFG5+DIF6

PGE1=EXP(DIS\*(PSI-DIFG1))/(1+EXP(DIS\*(PSI-DIFG1)))

;excluded PGE2 to PGE5 for brevity

PGE6=EXP(DIS\*(PSI-DIFG6))/(1+EXP(DIS\*(PSI-DIFG6)))

P0=1-PGE1

P1=PGE1-PGE2

,excluded P2 to P5 for brevity

P6=PGE6

ENDIF

;Select appropriate P(Y=k)

IF(MODEL.EQ.GR6.AND.DV.EQ.0) P=P0

;excluded P for DV=1 to DV=5 for brevity

IF(MODEL.EQ.GR6.AND.DV.EQ.6) P=P6

;------ BII Graded response model implementation (0-13) -----

IF(MODEL.EQ.GR13) THEN

DIFG1=DIF1

DIFG2=DIFG1+DIF2

;excluded DIFG3 TO DIFG12 for brevity

DIFG13=DIFG12+DIF13

PGE1=EXP(DIS\*(PSI-DIFG1))/(1+EXP(DIS\*(PSI-DIFG1)))

PGE2=EXP(DIS\*(PSI-DIFG2))/(1+EXP(DIS\*(PSI-DIFG2)))

;excluded PGE3 to PGE12 for brevity

PGE13=EXP(DIS\*(PSI-DIFG13))/(1+EXP(DIS\*(PSI-DIFG13)))

P0=1-PGE1

P1=PGE1-PGE2

;excluded P2 to P12 for brevity

P13=PGE13

ENDIF

Select appropriate P(Y=k)

IF(MODEL.EQ.GR13.AND.DV.EQ.0) P=P0

IF(MODEL.EQ.GR13.AND.DV.EQ.1) P=P1

;excluded definition of P for DV=2 to DV=12

IF(MODEL.EQ.GR13.AND.DV.EQ.13) P=P13

;IPRED = (P1\*1) + (P2\*2) + (P3\*3) + (P4\*4) + (P5\*5) + (P6\*6) + (P7\*7) + (P8\*8) + (P9\*9) + (P10\*10) + (P11\*11) + (P12\*12) + (P13\*13)

;RES = DV - IPRED

;-----Response probability prediction-----

IF(P.LT.1E-16) P = 1E-16 ; protection for P->0

IF(P.GT.(1-1E-16)) P = 1-1E-16 ; protection for P->1

Y=-2\*LOG(P)

;-----Simulation code-----

;REP=IREP

;IF(ICALL.EQ.4) THEN

; IF(MODEL.EQ.GR5) THEN

; CALL RANDOM (2,R)

; SDV=0

; IF(R.LT.PGE1) SDV=1

; IF(R.LT.PGE2) SDV=2

; IF(R.LT.PGE3) SDV=3

; IF(R.LT.PGE4) SDV=4

; IF(R.LT.PGE5) SDV=5

; ENDIF

; IF(MODEL.EQ.GR6) THEN

; CALL RANDOM (2,R)

; SDV=0

; IF(R.LT.PGE1) SDV=1

; IF(R.LT.PGE2) SDV=2

; IF(R.LT.PGE3) SDV=3

; IF(R.LT.PGE4) SDV=4

; IF(R.LT.PGE5) SDV=5

; IF(R.LT.PGE6) SDV=6

; ENDIF

;; IF(MODEL.EQ.GR13) THEN

; CALL RANDOM (2,R)

```
; SDV=0
; IF(R.LT.PGE1) SDV=1
; IF(R.LT.PGE2) SDV=2
; IF(R.LT.PGE3) SDV=3
; IF(R.LT.PGE4) SDV=4
; IF(R.LT.PGE5) SDV=5
; IF(R.LT.PGE6) SDV=6
; IF(R.LT.PGE7) SDV=7
; IF(R.LT.PGE8) SDV=8
; IF(R.LT.PGE9) SDV=9
; IF(R.LT.PGE10) SDV=10
; IF(R.LT.PGE11) SDV=11
; IF(R.LT.PGE12) SDV=12
; IF(R.LT.PGE13) SDV=13
; ENDIF
; DV=SDV
;ENDIF
;-----estimation task -----
```

```
$ESTIMATION MAXEVAL=99999 METHOD=COND LAPLACE -2LL PRINT=1
```

```
$COVARIANCE PRINT=E
```

```
$THETA
```

```
(0) FIX ; theta not used
```

```
(0) FIX ; theta not used
```

```
; ICC parameters
```

```
(0, 1.19) FIX ; 3 I1DISGR
```

```
(-4.56) FIX ; 4 I1DIF1GR
```

```
(0, 2.02) FIX ; 5 I1DIF2GR
```

```
(0, 1.86) FIX ; 6 I1DIF3GR
```

```
(0, 1.57) FIX ; 7 I1DIF4GR
```

```
(0, 1.4) FIX ; 8 I1DIF5GR
```

```
(0, 1.04) FIX ; 9 I2DISGR
```

```
(-5.55) FIX ; 10 I2DIF1GR
```

```
(0, 2.65) FIX ; 11 I2DIF2GR
```

```
(0, 2.06) FIX ; 12 I2DIF3GR
```

```
(0, 1.49) FIX ; 13 I2DIF4GR
```

(0, 1.53) FIX ; 14 I2DIF5GR

;excluded thetas for items 3 to 9 for brevity

;longitudinal parameters

(-0.0372) ; 66 TVBASE

(-1.22) ; 67 TVASY

(0, 16.2) ; 68 TPROG

(0) FIX ; theta not used

(-0.567) ; 70 TVDRUG

(-20, 0.0025,20) ; 71 BASERESV1

\$OMEGA BLOCK(3)

1.14

0.205 1.78

0 0.00495 0.000072

\$OMEGA

0.251
