# Supplementary material for: Integrated Item Response Theory Modeling of Multiple Patient-Reported Outcomes Assessing Lower Urinary Tract Symptoms Associated with Benign Prostatic Hyperplasia
Source: PubMed Central journal article supplement (PMC7391402; doi:10.1208/s12248-020-00484-7), 2020-07-29
Supplement: 12248_2020_484_MOESM3_ESM.pdf [file 12248_2020_484_MOESM3_ESM.pdf]

[; Bidimensional Integrated IRT model with compensatory graded response model for BII item](#)

\$PROBLEM

\$INPUT ID ID2 OID ITEM NDAY TIME DV GRP MDV

\$DATA ....csv IGNORE=@

\$PRED

;longitudinal parameters

TVBASEV = THETA(67)

BASEV = TVBASEV + ETA(1)

TVBASES = THETA(68)

BASES = TVBASES + ETA(2)

TVASYV = THETA(69)

ASYV=TVASYV\*(1+ETA(3)) ; Asymptote Maximum decrease in disease Status

TVASYS = THETA(70)

ASYS = TVASYS\*(1+ETA(3)) ; Asymptote Maximum decrease in disease Status

TPROGV = THETA(71)\*EXP(ETA(5)) ; T1/2 describing disease progression rate

TPROGS = THETA(72)\*EXP(ETA(5)) ; T1/2 describing disease progression rate

SLPREL=ETA(4)

WEIV = THETA(73)

WEIS = THETA(73)

TVDRUGV=0

IF(TIME.GT.0.AND.GRP.GT.0) TVDRUGV=THETA(74)

TVDRUGS=0

IF(TIME.GT.0.AND.GRP.GT.0) TVDRUGS=THETA(75)

VOIDPSI = BASEV + ASYV\*(1-EXP(-(LOG(2)/TPROGV\*TIME)\*\*WEIV)) + SLPREL\*TIME + TVDRUGV

STORPSI = BASES + ASYS\*(1-EXP(-(LOG(2)/TPROGS\*TIME)\*\*WEIS)) + SLPREL\*TIME + TVDRUGS

IF(ITEM.EQ.1.OR.ITEM.EQ.3.OR.ITEM.EQ.5.OR.ITEM.EQ.6) PSI = VOIDPSI

IF(ITEM.EQ.2.OR.ITEM.EQ.4.OR.ITEM.EQ.7.OR.ITEM.EQ.8) PSI = STORPSI

; BII is defined in compensatory GR model

;-----assignment of item parameters-----

;Constants to select the model type

GR5=1

GR6=2

GR13=3

MODEL=0

;IPSS items

IF(ITEM.EQ.1) THEN

MODEL=GR5

DIS=THETA(3) ; I1DISGR

DIF1=THETA(4) ; I1DIF1GR

DIF2=THETA(5) ; I1DIF2GR

DIF3=THETA(6) ; I1DIF3GR

DIF4=THETA(7) ; I1DIF4GR

DIF5=THETA(8) ; I1DIF5GR

ENDIF

; IPSS items 2 to 6 excluded for brevity

IF(ITEM.EQ.7) THEN

MODEL=GR5

DIS=THETA(39) ; I7DISGR

DIF1=THETA(40) ; I7DIF1GR

DIF2=THETA(41) ; I7DIF2GR

DIF3=THETA(42) ; I7DIF3GR

DIF4=THETA(43) ; I7DIF4GR

DIF5=THETA(44) ; I7DIF5GR

ENDIF

; QoL item

IF(ITEM.EQ.8) THEN

MODEL=GR6

DIS=THETA(45) ; QoLDISGR

DIF1=THETA(46) ; QoLDIF1GR

DIF2=THETA(47) ; QoLDIF2GR

DIF3=THETA(48) ; QoLDIF3GR

DIF4=THETA(49) ; QoLDIF4GR

DIF5=THETA(50) ; QoLDIF5GR

DIF6=THETA(51) ; QoLDIF5GR

ENDIF

; BII summary score

IF(ITEM.EQ.9) THEN

MODEL=GR13

DIS=THETA(52) ; BIIDISGR latent variable 1

DIS2 = THETA(66) ; BIIDISGR latent variable 2

DIF1=THETA(53) ; BIIDIF1GR  
DIF2=THETA(54) ; BIIDIF2GR  
DIF3=THETA(55) ; BIIDIF3GR  
DIF4=THETA(56) ; BIIDIF4GR  
DIF5=THETA(57) ; BIIDIF5GR  
DIF6=THETA(58) ; BIIDIF6GR  
DIF7=THETA(59) ; BIIDIF7GR  
DIF8=THETA(60) ; BIIDIF8GR  
DIF9=THETA(61) ; BIIDIF9GR  
DIF10=THETA(62) ; BIIDIF10GR  
DIF11=THETA(63) ; BIIDIF11GR  
DIF12=THETA(64) ; BIIDIF12GR  
DIF13=THETA(65) ; BIIDIF13GR

ENDIF

;------IPSS Graded response model implementation (0-5) -----;

IF(MODEL.EQ.GR5) THEN

DIFG1=DIF1

DIFG2=DIFG1+DIF2

DIFG3=DIFG2+DIF3

DIFG4=DIFG3+DIF4

DIFG5=DIFG4+DIF5

PGE1=EXP(DIS\*(PSI-DIFG1))/(1+EXP(DIS\*(PSI-DIFG1)))

PGE2=EXP(DIS\*(PSI-DIFG2))/(1+EXP(DIS\*(PSI-DIFG2)))

PGE3=EXP(DIS\*(PSI-DIFG3))/(1+EXP(DIS\*(PSI-DIFG3)))

PGE4=EXP(DIS\*(PSI-DIFG4))/(1+EXP(DIS\*(PSI-DIFG4)))

PGE5=EXP(DIS\*(PSI-DIFG5))/(1+EXP(DIS\*(PSI-DIFG5)))

P0=1-PGE1

P1=PGE1-PGE2

P2=PGE2-PGE3

P3=PGE3-PGE4

P4=PGE4-PGE5

P5=PGE5

ENDIF

;Select appropriate P(Y=k)

IF(MODEL.EQ.GR5.AND.DV.EQ.0) P=P0

IF(MODEL.EQ.GR5.AND.DV.EQ.1) P=P1

```

IF(MODEL.EQ.GR5.AND.DV.EQ.2) P=P2
IF(MODEL.EQ.GR5.AND.DV.EQ.3) P=P3
IF(MODEL.EQ.GR5.AND.DV.EQ.4) P=P4
IF(MODEL.EQ.GR5.AND.DV.EQ.5) P=P5
;IPRED = (P1*1) + (P2*2) + (P3*3) + (P4*4) + (P5*5)
;RES = DV - IPRED
;-----QoL Graded response model implementation (0-6) -----
IF(MODEL.EQ.GR6) THEN
DIFG1=DIF1
DIFG2=DIFG1+DIF2
DIFG3=DIFG2+DIF3
DIFG4=DIFG3+DIF4
DIFG5=DIFG4+DIF5
DIFG6=DIFG5+DIF6
PGE1=EXP(DIS*(PSI-DIFG1))/(1+EXP(DIS*(PSI-DIFG1)))
PGE2=EXP(DIS*(PSI-DIFG2))/(1+EXP(DIS*(PSI-DIFG2)))
PGE3=EXP(DIS*(PSI-DIFG3))/(1+EXP(DIS*(PSI-DIFG3)))
PGE4=EXP(DIS*(PSI-DIFG4))/(1+EXP(DIS*(PSI-DIFG4)))
PGE5=EXP(DIS*(PSI-DIFG5))/(1+EXP(DIS*(PSI-DIFG5)))
PGE6=EXP(DIS*(PSI-DIFG6))/(1+EXP(DIS*(PSI-DIFG6)))
P0=1-PGE1
P1=PGE1-PGE2
P2=PGE2-PGE3
P3=PGE3-PGE4
P4=PGE4-PGE5
P5=PGE5-PGE6
P6=PGE6
ENDIF
;Select appropriate P(Y=k)
IF(MODEL.EQ.GR6.AND.DV.EQ.0) P=P0
IF(MODEL.EQ.GR6.AND.DV.EQ.1) P=P1
IF(MODEL.EQ.GR6.AND.DV.EQ.2) P=P2
IF(MODEL.EQ.GR6.AND.DV.EQ.3) P=P3
IF(MODEL.EQ.GR6.AND.DV.EQ.4) P=P4
IF(MODEL.EQ.GR6.AND.DV.EQ.5) P=P5
IF(MODEL.EQ.GR6.AND.DV.EQ.6) P=P6

```

;----- BII Graded response model implementation (0-13) -----

IF(MODEL.EQ.GR13) THEN

DIFG1=DIF1

DIFG2=DIFG1+DIF2

DIFG3=DIFG2+DIF3

DIFG4=DIFG3+DIF4

DIFG5=DIFG4+DIF5

DIFG6=DIFG5+DIF6

DIFG7=DIFG6+DIF7

DIFG8=DIFG7+DIF8

DIFG9=DIFG8+DIF9

DIFG10=DIFG9+DIF10

DIFG11=DIFG10+DIF11

DIFG12=DIFG11+DIF12

DIFG13=DIFG12+DIF13

PGE1=EXP(DIS\*VOIDPSI+DIS2\*STORPSI-DIFG1) / (1+EXP(DIS\*VOIDPSI+DIS2\*STORPSI-DIFG1))

PGE2=EXP(DIS\*VOIDPSI+DIS2\*STORPSI-DIFG2) / (1+EXP(DIS\*VOIDPSI+DIS2\*STORPSI-DIFG2))

PGE3=EXP(DIS\*VOIDPSI+DIS2\*STORPSI-DIFG3) / (1+EXP(DIS\*VOIDPSI+DIS2\*STORPSI-DIFG3))

PGE4=EXP(DIS\*VOIDPSI+DIS2\*STORPSI-DIFG4) / (1+EXP(DIS\*VOIDPSI+DIS2\*STORPSI-DIFG4))

PGE5=EXP(DIS\*VOIDPSI+DIS2\*STORPSI-DIFG5) / (1+EXP(DIS\*VOIDPSI+DIS2\*STORPSI-DIFG5))

PGE6=EXP(DIS\*VOIDPSI+DIS2\*STORPSI-DIFG6) / (1+EXP(DIS\*VOIDPSI+DIS2\*STORPSI-DIFG6))

PGE7=EXP(DIS\*VOIDPSI+DIS2\*STORPSI-DIFG7) / (1+EXP(DIS\*VOIDPSI+DIS2\*STORPSI-DIFG7))

PGE8=EXP(DIS\*VOIDPSI+DIS2\*STORPSI-DIFG8) / (1+EXP(DIS\*VOIDPSI+DIS2\*STORPSI-DIFG8))

PGE9=EXP(DIS\*VOIDPSI+DIS2\*STORPSI-DIFG9) / (1+EXP(DIS\*VOIDPSI+DIS2\*STORPSI-DIFG9))

PGE10=EXP(DIS\*VOIDPSI+DIS2\*STORPSI-DIFG10) / (1+EXP(DIS\*VOIDPSI+DIS2\*STORPSI-DIFG10))

PGE11=EXP(DIS\*VOIDPSI+DIS2\*STORPSI-DIFG11) / (1+EXP(DIS\*VOIDPSI+DIS2\*STORPSI-DIFG11))

PGE12=EXP(DIS\*VOIDPSI+DIS2\*STORPSI-DIFG12) / (1+EXP(DIS\*VOIDPSI+DIS2\*STORPSI-DIFG12))

PGE13=EXP(DIS\*VOIDPSI+DIS2\*STORPSI-DIFG13) / (1+EXP(DIS\*VOIDPSI+DIS2\*STORPSI-DIFG13))

P0=1-PGE1

P1=PGE1-PGE2

P2=PGE2-PGE3

P3=PGE3-PGE4

P4=PGE4-PGE5

P5=PGE5-PGE6

P6=PGE6-PGE7

P7=PGE7-PGE8

```

P8=PGE8-PGE9
P9=PGE9-PGE10
P10=PGE10-PGE11
P11=PGE11-PGE12
P12=PGE12-PGE13
P13=PGE13
ENDIF
;Select appropriate P(Y=k)
IF(MODEL.EQ.GR13.AND.DV.EQ.0) P=P0
IF(MODEL.EQ.GR13.AND.DV.EQ.1) P=P1
IF(MODEL.EQ.GR13.AND.DV.EQ.2) P=P2
IF(MODEL.EQ.GR13.AND.DV.EQ.3) P=P3
IF(MODEL.EQ.GR13.AND.DV.EQ.4) P=P4
IF(MODEL.EQ.GR13.AND.DV.EQ.5) P=P5
IF(MODEL.EQ.GR13.AND.DV.EQ.6) P=P6
IF(MODEL.EQ.GR13.AND.DV.EQ.7) P=P7
IF(MODEL.EQ.GR13.AND.DV.EQ.8) P=P8
IF(MODEL.EQ.GR13.AND.DV.EQ.9) P=P9
IF(MODEL.EQ.GR13.AND.DV.EQ.10) P=P10
IF(MODEL.EQ.GR13.AND.DV.EQ.11) P=P11
IF(MODEL.EQ.GR13.AND.DV.EQ.12) P=P12
IF(MODEL.EQ.GR13.AND.DV.EQ.13) P=P13
;IPRED = (P1*1) + (P2*2) + (P3*3) + (P4*4) + (P5*5) + (P6*6) +(P7*7) + (P8*8) + (P9*9) + (P10*10) + (P11*11) + (P12*12) + (P13*13)
;RES = DV - IPRED
;-----Response probability prediction-----
IF(P.LT.1E-16) P = 1E-16 ; protection for P->0
IF(P.GT.(1-1E-16)) P = 1-1E-16 ; protection for P->1
Y=-2*LOG(P)
;-----Simulation code-----
;IF(ICALL.EQ.4) THEN
;      CALL RANDOM (2,R)
;      SDV=0
;      IF(R.LT.PGE1) SDV=1
;      IF(R.LT.PGE2) SDV=2
;      IF(R.LT.PGE3) SDV=3
;      IF(R.LT.PGE4) SDV=4

```

```

;      IF(R.LT.PGE5) SDV=5
;
;      IF(ITEM.EQ.1) SCORE=0
;      IF(ITEM.EQ.100) DV=SCORE
;      SCORE=SCORE+SDV
;      DV=SDV
;ENDIF

;-----estimation task -----

$COV PRINT=E

$EST MAXEVAL=99999 METHOD=COND LAPLACE -2LL PRINT=1 NUMERICAL NSIG=2 MCETA=10 NOABORT MSFO=msf_run7778

$TABLE ID NDAY TIME ITEM DV PSI MDV FILE=psi_estimates_tab7778 NOAPPEND ONEHEADER NOPRINT

$TABLE ITEM DIS DIF1 DIF2 DIF3 DIF4 DIF5 DIF6 DIF7 DIF8 DIF9 DIF10 DIF11 DIF12 DIF13 MDV FILE=item_parameters_tab7778 NOAPPEND
ONEHEADER NOPRINT

$TABLE ID TIME ETA1 ETA2 PSI FILE=param_estimates_tab7778 NOAPPEND ONEHEADER NOPRINT

;-----fixed effects for slope and baseline-----

$THETA

(0) FIX ;
(0) FIX ;
(0, 1.59) FIX ; 3 I1DISGR
(-3.46) FIX ; 4 I1DIF1GR
(0, 1.59) FIX ; 5 I1DIF2GR
(0, 1.46) FIX ; 6 I1DIF3GR
(0, 1.22) FIX ; 7 I1DIF4GR
(0, 1.1) FIX ; 8 I1DIF5GR
(0, 1.13) FIX ; 9 I2DISGR
(-5.73) FIX ; 10 I2DIF1GR
(0, 2.66) FIX ; 11 I2DIF2GR
(0, 2.13) FIX ; 12 I2DIF3GR
(0, 1.52) FIX ; 13 I2DIF4GR
(0, 1.52) FIX ; 14 I2DIF5GR
(0, 1.58) FIX ; 15 I3DISGR
(-3.12) FIX ; 16 I3DIF1GR
(0, 1.53) FIX ; 17 I3DIF2GR
(0, 1.36) FIX ; 18 I3DIF3GR
(0, 0.905) FIX ; 19 I3DIF4GR
(0, 1.13) FIX ; 20 I3DIF5GR
(0, 0.893) FIX ; 21 I4DISGR

```

(-4.42) FIX ; 22 I4DIF1GR  
(0, 2.27) FIX ; 23 I4DIF2GR  
(0, 1.87) FIX ; 24 I4DIF3GR  
(0, 1.36) FIX ; 25 I4DIF4GR  
(0, 1.56) FIX ; 26 I4DIF5GR  
(0, 1.36) FIX ; 27 I5DISGR  
(-4.22) FIX ; 28 I5DIF1GR  
(0, 1.94) FIX ; 29 I5DIF2GR  
(0, 1.42) FIX ; 30 I5DIF3GR  
(0, 1.1) FIX ; 31 I5DIF4GR  
(0, 0.935) FIX ; 32 I5DIF5GR  
(0, 1.23) FIX ; 33 I6DISGR  
(-2.49) FIX ; 34 I6DIF1GR  
(0, 1.4) FIX ; 35 I6DIF2GR  
(0, 1.37) FIX ; 36 I6DIF3GR  
(0, 1.36) FIX ; 37 I6DIF4GR  
(0, 1.34) FIX ; 38 I6DIF5GR  
(0, 0.6) FIX ; 39 I7DISGR  
(-7.39) FIX ; 40 I7DIF1GR  
(0, 4.56) FIX ; 41 I7DIF2GR  
(0, 3.18) FIX ; 42 I7DIF3GR  
(0, 2.16) FIX ; 43 I7DIF4GR  
(0, 1.8) FIX ; 44 I7DIF5GR  
(0, 1.34) FIX ; 45 QoLDISGR  
(-7.46) FIX ; 46 QoLDIF1GR  
(0, 2.85) FIX ; 47 QoLDIF2GR  
(0, 2.02) FIX ; 48 QoLDIF3GR  
(0, 1.92) FIX ; 49 QoLDIF4GR  
(0, 1.42) FIX ; 50 QoLDIF5GR  
(0, 1.61) FIX ; 51 QoLDIF6GR  
(0, 0.71) FIX ; 52 BIIDISGR  
(-4.99) FIX ; 53 BIIDIF1GR  
(0, 0.941) FIX ; 54 BIIDIF2GR  
(0, 0.909) FIX ; 55 BIIDIF3GR  
(0, 0.797) FIX ; 56 BIIDIF4GR  
(0, 0.747) FIX ; 57 BIIDIF5GR



(0, 0.531) FIX ; 58 BIIDIF6GR  
(0, 0.535) FIX ; 59 BIIDIF7GR  
(0, 0.766) FIX ; 60 BIIDIF8GR  
(0, 1.25) FIX ; 61 BIIDIF9GR  
(0, 0.668) FIX ; 62 BIIDIF10GR  
(0, 0.89) FIX ; 63 BIIDIF11GR  
(0, 1.01) FIX ; 64 BIIDIF12GR  
(0, 2.42) FIX ; 65 BIIDIF13GR  
(0, 0.407) FIX ; 66 DIS2 BII  
(-0.0398) ; 67 BASEV  
(-0.0718) ; 68 BASES  
(-0.762) ; 69 ASYV  
(-0.972) ; 70 ASYS  
(0, 15.2) ; 71 TPROGV  
(0, 11) ; 72 TPROGS  
(0, 1.41) ; 73 wei  
(-0.55) ; 74 DRUGV  
(-0.827) ; 75 DRUGS  
\$OMEGA BLOCK(2)  
1.03 ; IIV BASEV  
0.418 1.65 ; IIV BASES  
\$OMEGA BLOCK(2)  
1.53 ; IIV ASYV  
0.00297 0.000045 ; SLPREL  
\$OMEGA  
0.314 ; TPROG
